# Supplementary material
Source: publisher site journal article supplement (https://www.dovepress.com/get_supplementary_file.php?f=385356.docx)
Supplement: Supplementary file 1 [file get_supplementary_file.php]

**Table S1.** The incidence rates of MASF in different pregnant gestational weeks and different grade of MASF

|  | | Incidence rates | Reference |
| --- | --- | --- | --- |
| MASF | Before 36+6weeks gestation | 4.3% (45/1054) [before 33 weeks] | 1 |
| 4.8% (24/506) | 2 |
| 6.9 % (182/2625) | 3 |
| 37~40+6weeks gestation | 10.0% (2818/28248) | 4 |
| 14.6% (4998/34303) | 5 |
| 41~ weeks gestation | 2.1% (581/28248) | 4 |
| 9.2% (3145/34303) | 5 |
| 42~ weeks gestation | 3.4% (1156/34303) | 5 |
| 29.7% (8903/30005) | 6 |
| Different grade of MASF | Thin and moderate / I~II | 92.2% (368/399, N=10445) | 7 |
| 89.4% (3810/4260, N=24445) | 8 |
| Thick / III | 7.8% (31/399) | 7 |
| 10.6% (450/4260) | 8 |

**References**

1. Tybulewicz AT, Clegg SK, Fonfé GJ, Stenson BJ. Preterm meconium staining of the amniotic fluid: associated findings and risk of adverse clinical outcome. *Arch Dis Childh*. 2004;89(4):F328–F330. doi:10.1136/adc.2002.02194931.

2. Scott H, Walker M, Gruslin A. Significance of meconium-stained amniotic fluid in the preterm population. *J Perinatol*. 2001;21(3):174–177. doi:10.1038/sj.jp.720052132.

3. Attali E, Kern G, Reicher L, et al. Early Preterm meconium stained amniotic fluid is an independent risk factor for peripartum maternal bacteremia. *Eur J Obstet Gynecol Reprod Biol*. 2021;258:75–79. doi:10.1016/j.ejogrb.2020.12.05233.

4. Hiersch L, Krispin E, Linder N, et al. Meconium-stained amniotic fluid and neonatal morbidity in low-risk pregnancies at term: the effect of gestational age. *Am J Perinatol*. 2017;34(2):183–190. doi:10.1055/s-0036-158505634.

5. Ward C, Caughey AB. The risk of meconium aspiration syndrome (MAS) increases with gestational age at term. J Matern Fetal Neonatal Med. 2022;35(1):155–160. doi:10.1080/14767058.2020.1713744.

6. Murzakanova G, Räisänen S, Jacobsen AF, Sole KB, Bjarkø L, Laine K. Adverse perinatal outcomes in 665,244 term and post-term deliveries-a Norwegian population-based study. *Eur J Obstet Gynecol Reprod Biol*. 2020;247:212–218. doi:10.1016/j.ejogrb.2020.02.028.

7. Gluck O, Kovo M, Tairy D, Herman HG, Bar J, Weiner E. The effect of meconium thickness level on neonatal outcome. *Early Hum Dev*. 2020;142:104953. doi:10.1016/j.earlhumdev.2020.104953.

8. Itzhaki-Bachar L, Meyer R, Levin G, Weissmann-Brenner A. Incidental finding of meconium-stained amniotic fluid in elective cesarean deliveries: features and perils. *Int J Gynecol Obstet*. 2021;158:418.
